# Supplementary material
Source: publisher site journal article supplement (https://www.dovepress.com/article/489407)
Supplement: Supplementary file 1 [file get_supplementary_file.php]

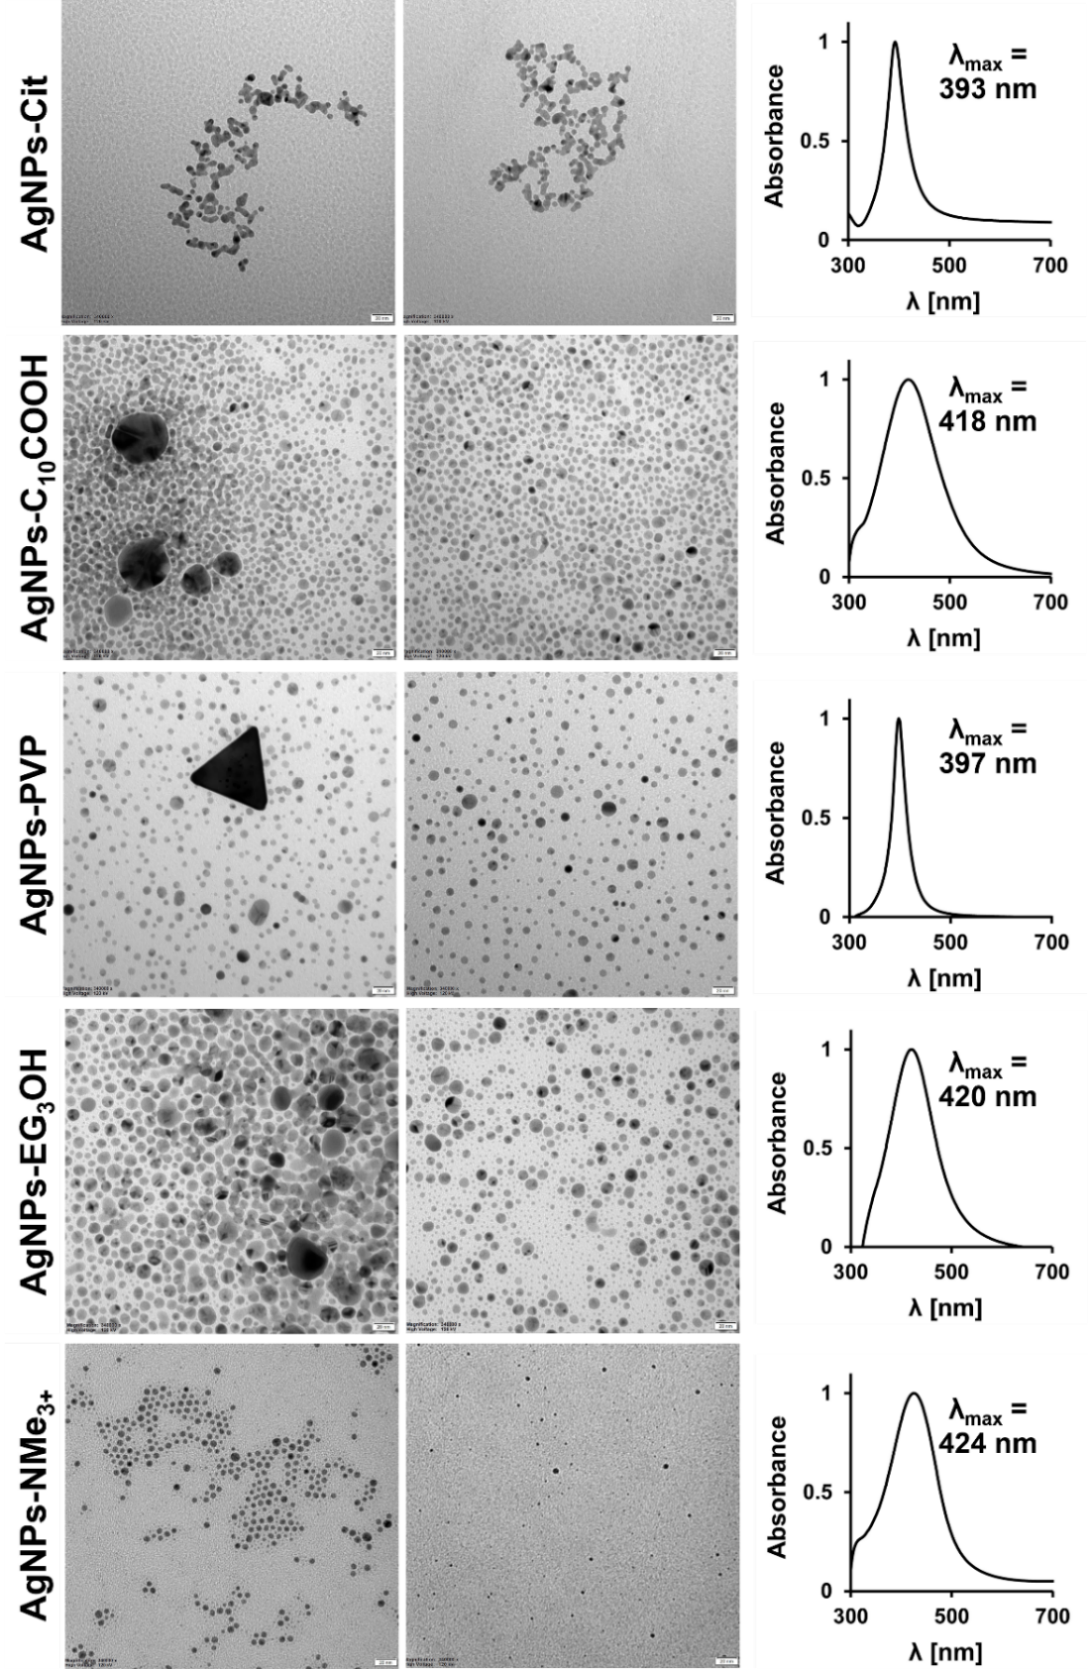


**Supplementary Figure 1** Transmission electron micrographs (left and middle panel) and absorption spectra (right panel) of the tested silver nanoparticle (AgNP) colloids. The white bar on each micrograph represents 20 nm. AgNPs-Cit, AgNPs stabilized with sodium citrate. AgNPs-C10COOH, AgNPs stabilized with mercaptoundecanoic acid. AgNPs-PVP, AgNPs stabilized with polyvinylpyrrolidone. AgNPs-EG3OH, AgNPs stabilized with triethylene glycol mono-11-mercaptoundecyl ether. AgNPs-NMe3+, AgNPs stabilized with (11-mercaptoundecyl)-*N*,*N*,*N*-trimethylammonium chloride.

**Supplementary Table 1** Physicochemical properties of silver nanoparticles (AgNPs) used throughout the study. Statistical significance for the core size and hydrodynamic diameter data was determined with two-way analysis of variance followed by post hoc Tukey’s test (P < 0.001, α = 0.05). Next, statistical significance of the size and diameter was determined with a two-sample t-test. The means with the same letters are significantly different (P < α, α = 0.05).

| **Colloid** | **Core size**  **[nm]** | **Hydrodynamic diameter measurement** | | **Zeta potential measurements** | | |
| --- | --- | --- | --- | --- | --- | --- |
| **Hydrodynamic diameter**  **[d.nm]** | **PDI** | **ζ-potential**  **[mV]** | **Ag conc.**  **[mg/L]** | **Conductivity**  **[mS/cm]** |
| AgNPs-Cit | 5 ± 2ab | 9 ± 2abc | 0.236 | -47.6 ± 0.8 | 73 ± 1 | 0.112 |
| AgNPs-C10COOH | 6 ± 3acde | 35 ± 9ade | 0.292 | -39.0 ± 0.7 | 791 ± 24 | 0.017 |
| AgNPs-PVP | 5 ± 2cf | 47 ± 13bfg | 0.229 | -21.5 ± 0.5 | 72 ± 2 | 0.025 |
| AgNPs-EG3OH | 5 ± 4dg | 13 ± 7dfh | 0.691 | +14.9 ± 0.3 | 96 ± 0.5 | 0.017 |
| AgNPs-NMe3+ | 4 ± 2befg | 2 ± 0.4cegh | 0.580 | +68.5 ± 2.2 | 192 ± 7 | 0.024 |

AgNPs, silver nanoparticles;

d.nm, hydrodynamic diameter in nm;

PDI, polydispersity index;

ζ, zeta;

Ag conc., concentration of silver;

AgNPs-Cit, AgNPs stabilized with sodium citrate;

AgNPs-C10COOH, AgNPs stabilized with mercaptoundecanoic acid;

AgNPs-PVP, AgNPs stabilized with polyvinylpyrrolidone;

AgNPs-EG3OH, AgNPs stabilized with triethylene glycol mono-11-mercaptoundecyl ether;

AgNPs-NMe3+, AgNPs stabilized with (11-Mercaptoundecyl)-N,N,N-trimethylammonium chloride.

**Supplementary Table 2** Summarized analysis of the antibacterial potential of silver nitrate and selected silver nanoparticle colloids toward the tested bacterial species.

|  | G-pos bacteria | |  | G-neg bacteria | | | |
| --- | --- | --- | --- | --- | --- | --- | --- |
|  | **SA** | **EF** |  | **EC** | **PA** | **AB** | **KP** |
| Ag source | **Median MIC / Median MBC** | | | | | | |
| AgNO3 | 2 / 8 | 2 / 4 |  | 2 / 4 | 0.5 / 1 | 2/ 8 | 4 / 8 |
| AgNPs-Cit | 16 / 32 | 32 / 128 |  | 1 / 1 | 2 / 2 | 4 / 4 | 64 / 128 |
| AgNPs-C10COOH | 8 / 128 | 16 / 256 |  | 4 / 4 | 4 / 4 | 8 / 16 | 256 / 256 |
| AgNPs-PVP | 4 / 32 | 4 / 32 |  | 0.5 / 1 | 2 / 2 | 2 / 2 | 4 / 16 |
| AgNPs-EG3OH | 1 / 2 | 2 / 32 |  | 0.5 / 0.5 | 2 / 2 | 0.5 / 1 | 32 / 64 |
| AgNPs-NMe3+ | 2 / 16 | 8 / 32 |  | 2 / 4 | 4 / 8 | 8 / 16 | 32 / 64 |

G-pos – gram-positive;

G-neg – gram-negative;

SA, *S. aureus* ATCC 25923;

EF, *E. faecalis* ATCC 19433;

EC, *E. coli ATCC* 25922;

PA, *P. aeruginosa* ATCC 27853;

AB, *A. baumannii* ATCC 19606;

KP, *K. pneumoniae* ATCC 700603;

MIC, minimal inhibitory concentration of silver source (µg Ag/mL);

MBC, minimal bactericidal concentration of silver source (µg Ag/mL);

AgNPs-Cit, AgNPs stabilized with sodium citrate;

AgNPs-C10COOH, AgNPs stabilized with mercaptoundecanoic acid;

AgNPs-PVP, AgNPs stabilized with polyvinylpyrrolidone;

AgNPs-EG3OH, AgNPs stabilized with triethylene glycol mono-11-mercaptoundecyl ether;

AgNPs-NMe3+, AgNPs stabilized with (11-Mercaptoundecyl)-N,N,N-trimethylammonium chloride.


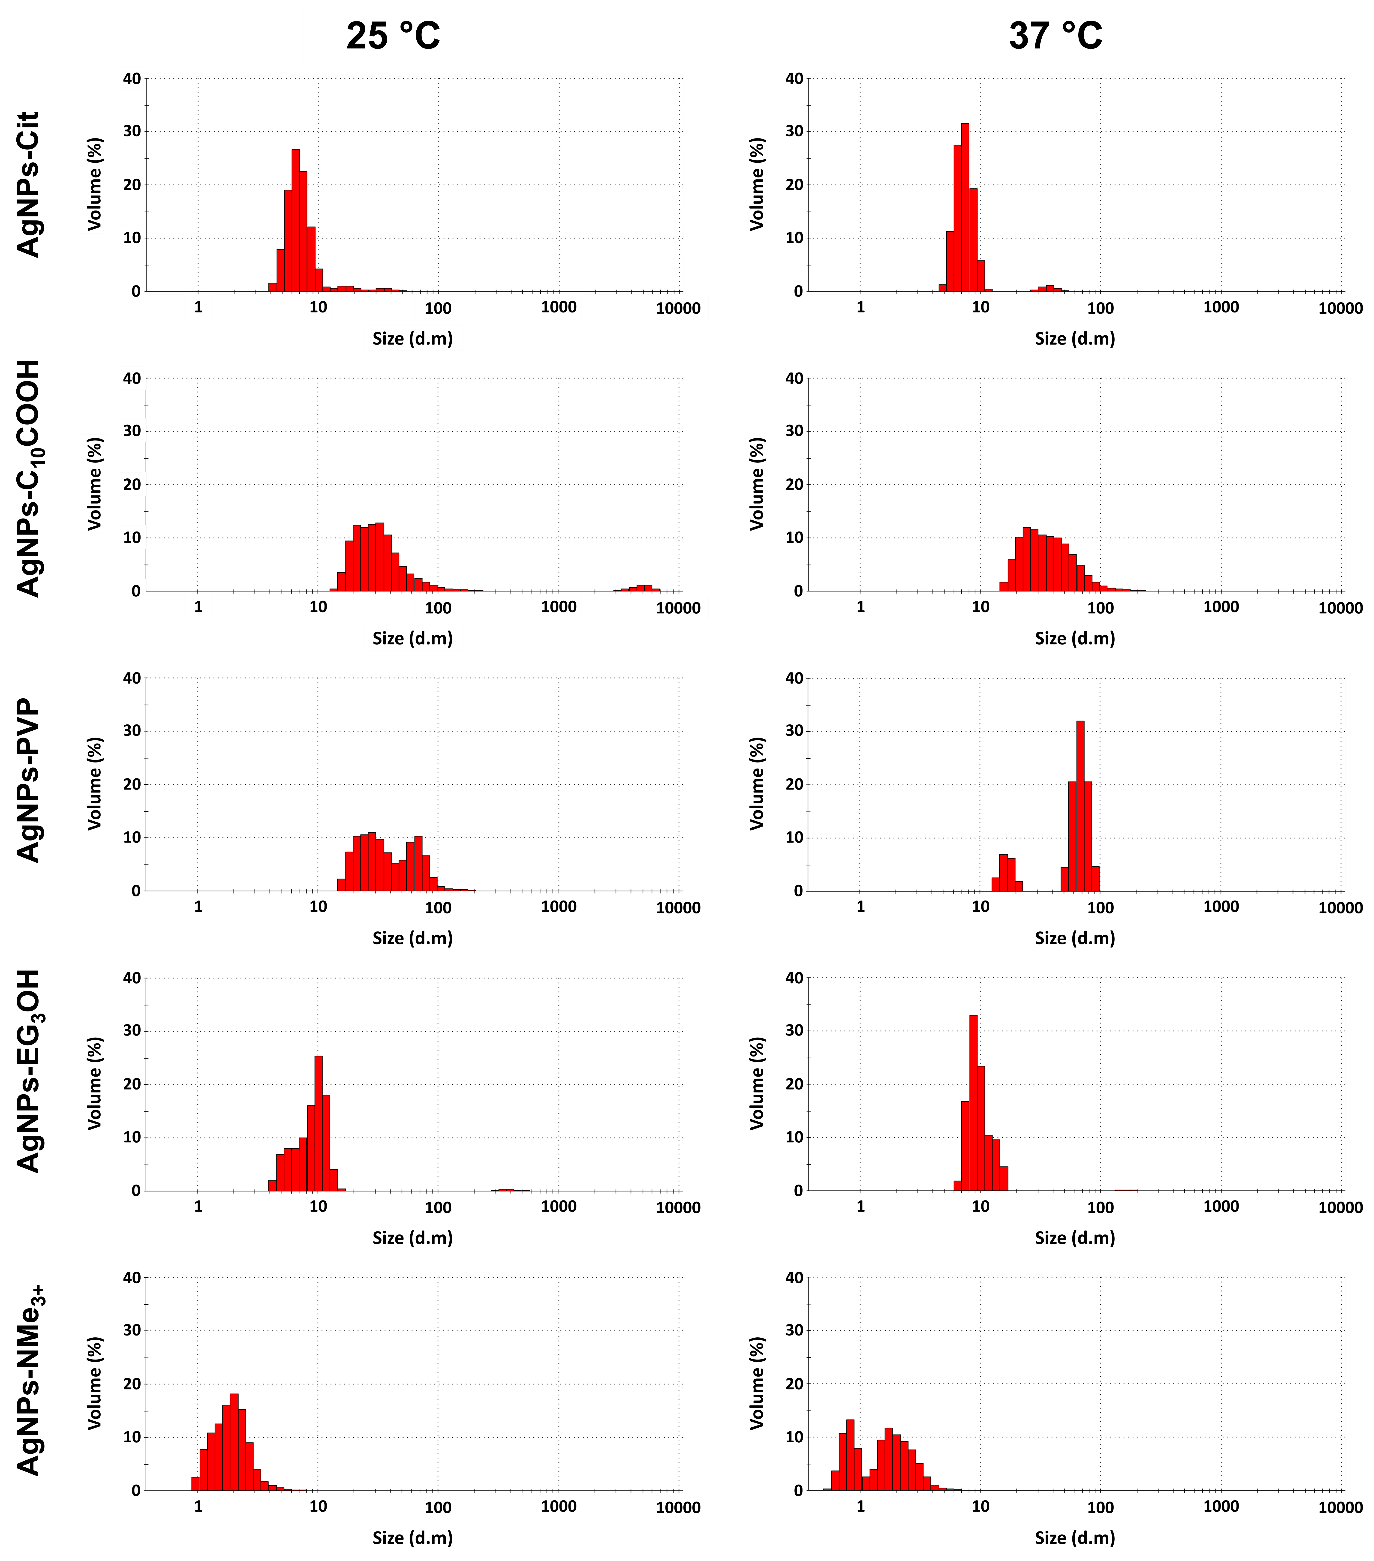


**Supplementary Figure 2** Size distribution histograms of the tested silver nanoparticles (AgNPs) at 25 °C (left panel) and 37 °C (right panel). d.m., hydrodynamic diameter in nm. AgNPs-Cit, AgNPs stabilized with sodium citrate. AgNPs-C10COOH, AgNPs stabilized with mercaptoundecanoic acid. AgNPs-PVP, AgNPs stabilized with polyvinylpyrrolidone. AgNPs-EG3OH, AgNPs stabilized with triethylene glycol mono-11-mercaptoundecyl ether. AgNPs-NMe3+, AgNPs stabilized with (11-mercaptoundecyl)-*N*,*N*,*N*-trimethylammonium chloride.

**Supplementary Table 3** The hemolytic and cytotoxic potential of silver nitrate and the tested silver nanoparticle (AgNP) colloids. Statistical significance of the concentration required to cause 50% hemolysis (HC50) was determined with two-way analysis of variance followed by post hoc Tukey’s test (P < 0.001, α = 0.05). Statistical significance of the concentration required to reduce cell viability by 50% (IC50) was determined with a two sample t-test. The means with the same letters are significantly different (P < α, α = 0.05).

| Ag source | HC50 (µg Ag/mL) | IC50 (µg Ag/mL) |
| --- | --- | --- |
| AgNO3 | 119 ± 16 abc | 0.33 ± 0.01 x |
| AgNPs-Cit | 70 ± 8 ade | nt |
| AgNPs-C10COOH | > 128 § | > 128 § |
| AgNPs-PVP | 62 ± 2 bdfg | nt |
| AgNPs-EG3OH | 28 ± 4 cfh | nt |
| AgNPs-NMe3+ | 125 ± 19 egh | 59 ± 1 x |

HC50, half maximal haemolytic concentration, i.e., concentration that causes 50% hemolysis;

IC50, half maximal inhibitory concentration, i.e., concentration that causes a 50% reduction in cell viability;

nt, not tested;

§, value above the tested range, statistical test not applicable;

AgNPs-Cit, AgNPs stabilized with sodium citrate;

AgNPs-C10COOH, AgNPs stabilized with mercaptoundecanoic acid;

AgNPs-PVP, AgNPs stabilized with polyvinylpyrrolidone;

AgNPs-EG3OH, AgNPs stabilized with triethylene glycol mono-11-mercaptoundecyl ether;

AgNPs-NMe3+, AgNPs stabilized with (11-Mercaptoundecyl)-N,N,N-trimethylammonium chloride.


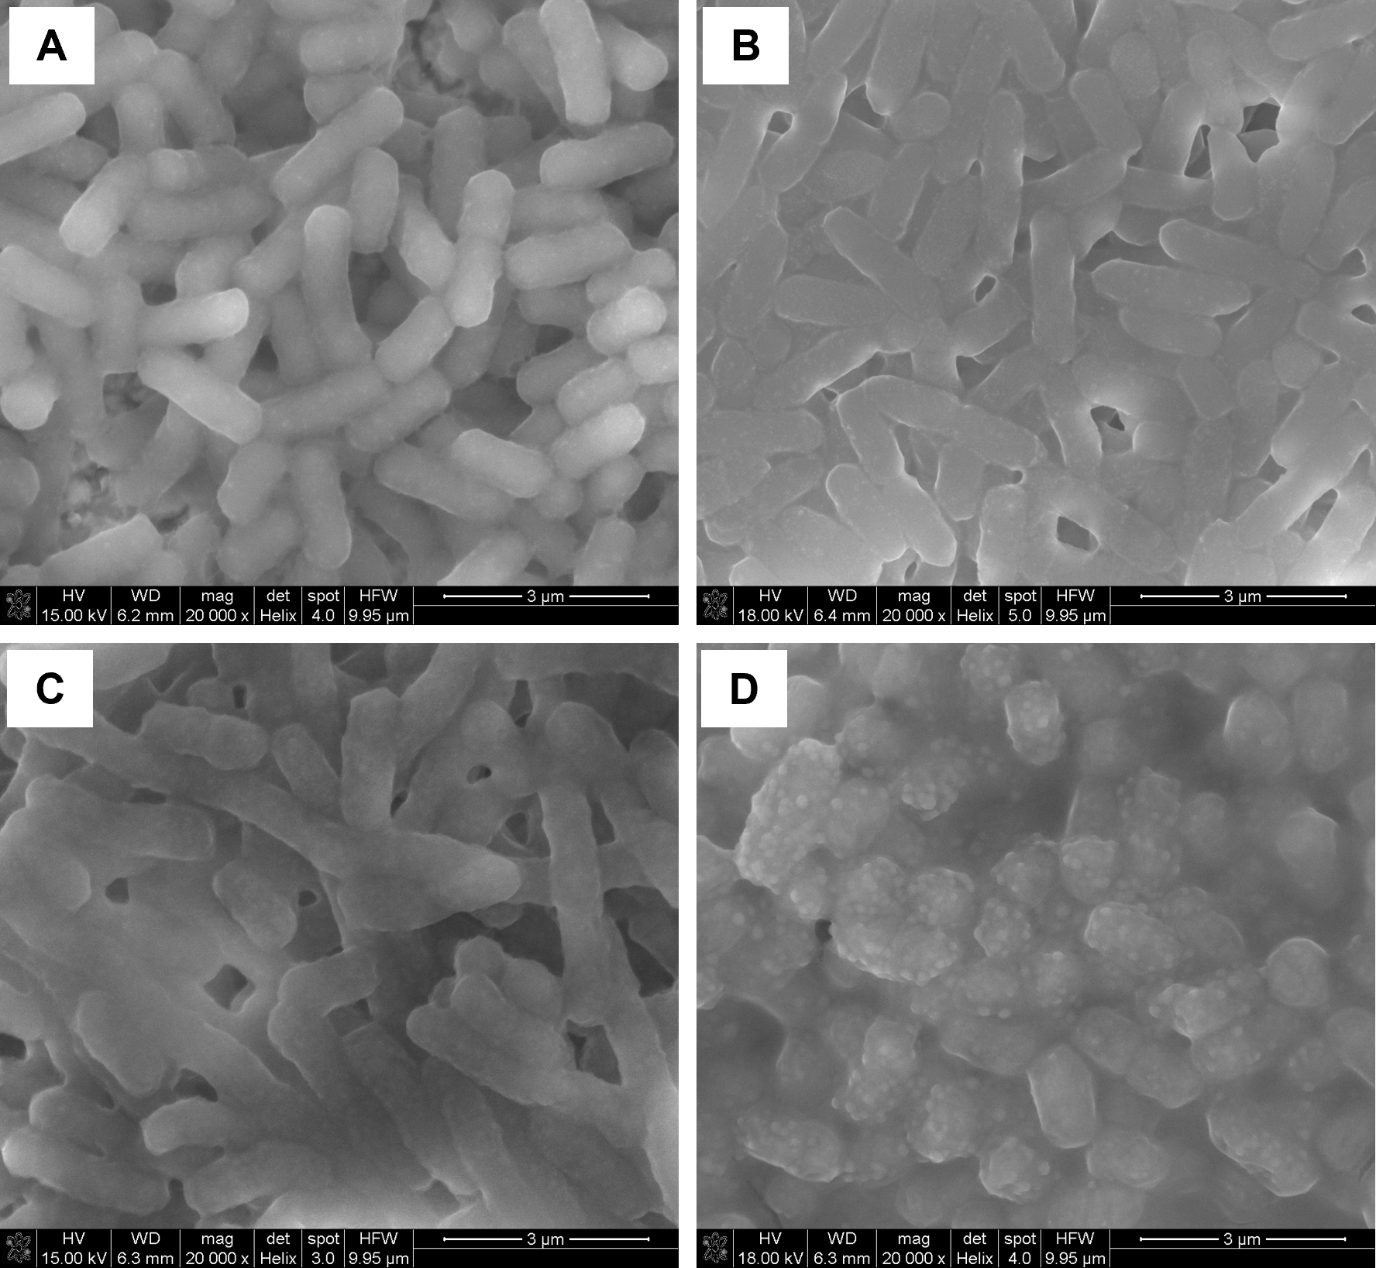


**Supplementary Figure 3** Scanning electron micrographs of the cell surface of the gram-negative bacteria (A) *Escherichia coli*, (B) *Pseudomonas aeruginosa*, (C) *Acinetobacter baumannii*, and (D) *Klebsiella pneumoniae*.
